# Supplementary material for: Stretchable, alternating-current-driven white electroluminescent device based on bilayer-structured quantum-dot-embedded polydimethylsiloxane elastomer
Source: Royal Society of Chemistry journal article supplement (doi:10.1039/c7ra00195a), 2017-01-01
Supplement: c7ra00195a1.pdf [file c7ra00195a1.pdf]

## Supplementary Information

Stretchable, Alternating-Current-Driven White Electroluminescent Device  
Based on Bilayer-Structured Quantum-Dot-Embedded  
Polydimethylsiloxane Elastomer

*Soon Moon Jeong, \*††<sup>a</sup> Seongkyu Song, ††<sup>a</sup> Hyunmin Kim,<sup>a</sup> Seong-Ho Baek,<sup>a</sup> and Joon Seop Kwak<sup>b</sup>*

<sup>a</sup> Division of Nano and Energy Convergence Research, DGIST, Daegu 711-873, Republic of Korea

<sup>b</sup> Department of Printed Electronics Engineering, Suncheon National University, Suncheon, Jeonnam 540-742, Republic of Korea

\*Corresponding author: smjeong@dgist.ac.kr

††These authors contributed equally to this work

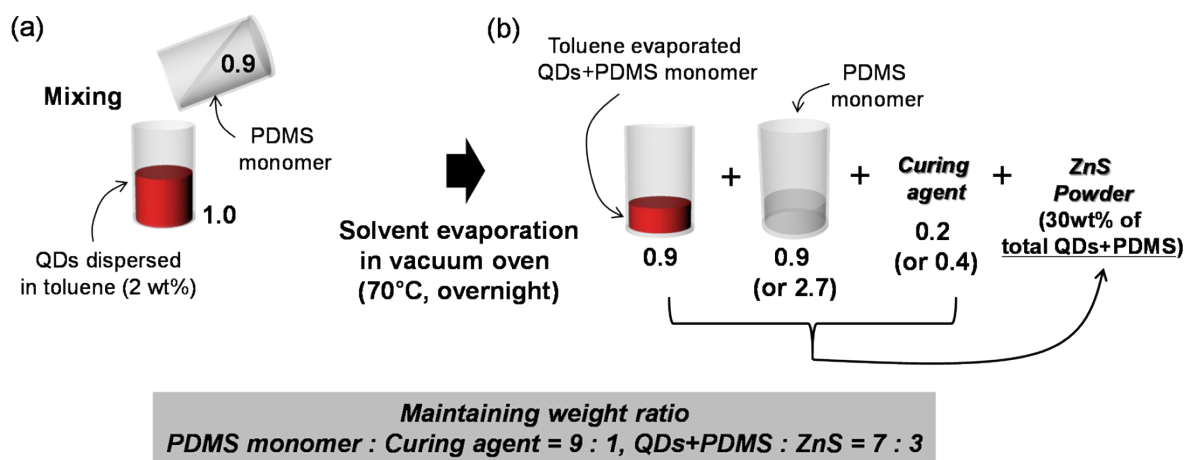

**Figure S1.** Schematic of the QDs+ZnS+PDMS solution preparation process. a) The QD solution (20 mg/ml, dispersed in toluene) and liquid PDMS were mixed at a weight ratio of 1:0.9. After evaporating the toluene at 70°C overnight in a vacuum oven, b) the QDs+PDMS and liquid PDMS were again mixed at a weight ratio of 1:0.9, a blue-green phosphor was uniformly mixed, and then, a curing agent (0.2) was added at a total weight ratio of 7:3 (QDs+PDMS:phosphor).

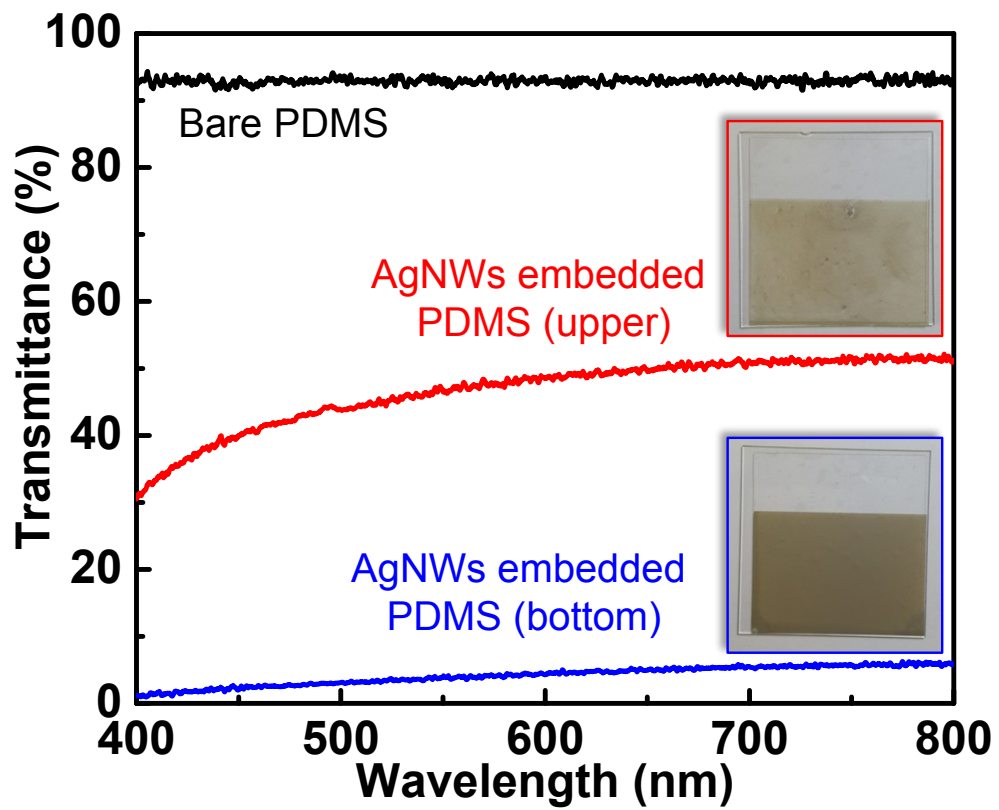

**Figure S2.** Transmittance spectra and photographs of the AgNW-embedded PDMS layers.
